# Supplementary material for: Rates of Molecular Evolution in a Marine Synechococcus Phage Lineage
Source: MDPI journal article supplement (doi:10.3390/v11080720), 2019-08-06
Supplement: s1 [file s1]

## Supplementary Material

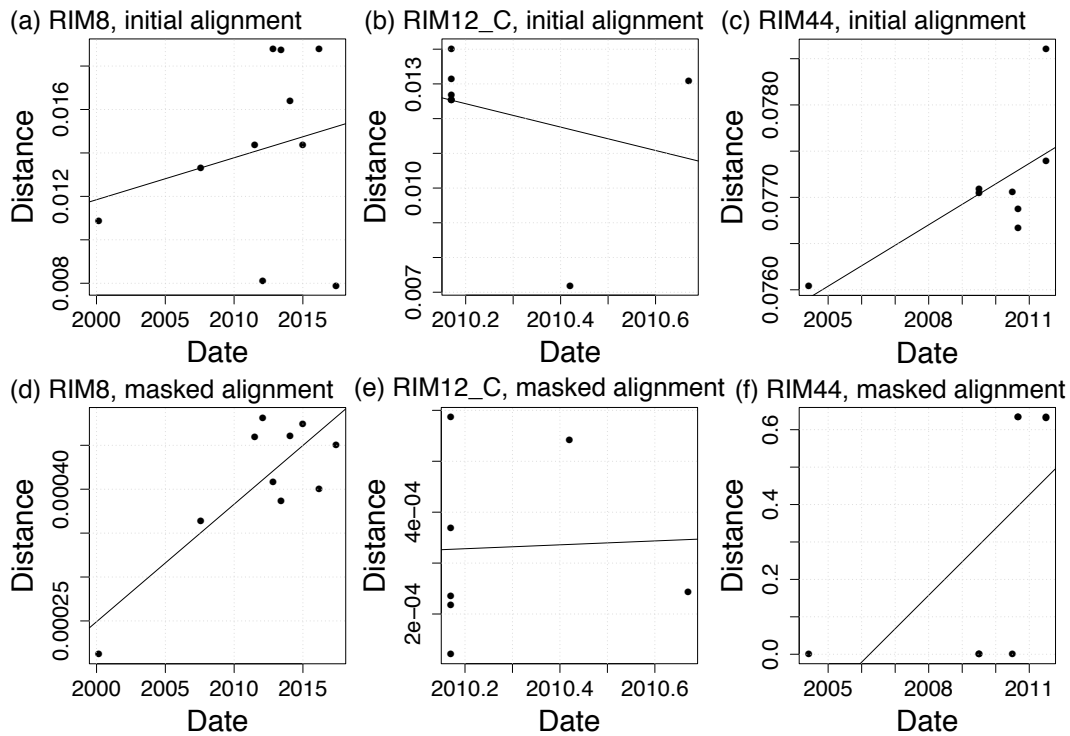

**Figure S1.** Plots of root-to-tip distance against isolation date. The line shows the linear regression.

**Table S1.** Temporal signal.

| Data set | p-value Phi test | Initial alignment |          |           |          | Masked alignment |                 |           |          |
|----------|------------------|-------------------|----------|-----------|----------|------------------|-----------------|-----------|----------|
|          |                  | Length            | RTT r2   | RTT rate  | LSD rate | Length           | RTT r2          | RTT rate  | LSD rate |
| RIM2     | 6.01E-34         | 176619            | 0.007402 | 2.69E-04  | 1.00E-10 | 145832           | 0.005428        | 4.80E-06  | 7.67E-06 |
| RIM2_A   | 3.94E-27         | 176002            | 0.007044 | -5.79E-05 | 1.00E-10 | 156444           | 0.000145        | 8.93E-07  | 1.00E-10 |
| RIM2_B   | 5.24E-09         | 175809            | 0.04372  | 4.78E-04  | 9.42E-04 | 128222           | 0.180924        | 6.50E-05  | 4.48E-05 |
| RIM8     | <b>0.0151</b>    | 173430            | 0.05296  | 1.93E-04  | 6.08E-05 | 124593           | <b>0.686509</b> | 1.34E-05  | 1.28E-05 |
| RIM12    | 5.98E-10         | 184878            | 0.021512 | 1.56E-03  | 1.00E-10 | 100902           | 0.001547        | 4.70E-06  | 4.91E-06 |
| RIM12_A  | 2.07E-12         | 176026            | 0.002011 | 5.13E-05  | 2.56E-06 | 159097           | 0.000028        | 6.36E-07  | 1.00E-10 |
| RIM12_C  | <b>0.013</b>     | 179187            | 0.086151 | -3.37E-03 | 1.00E-10 | 161566           | 0.001897        | 3.89E-05  | 2.07E-06 |
| RIM14    | 9.79E-08         | 181443            | 0.167003 | -3.02E-03 | 1.00E-10 | 179994           | 0.209073        | -5.40E-04 | 1.00E-10 |
| RIM44    | <b>0.059</b>     | 207024            | 0.486262 | 2.21E-04  | 2.54E-04 | 43429            | 0.367625        | 8.94E-02  | 1.00E-10 |

Phi test p-values > 0.01 and  $r^2$  values > 0.5 are marked in bold. RTT – root-to-tip.

**Table S2.** Protein families. (separate file)

Start and end give the location of the protein families in the full alignment. Type denotes *T* for a T4 core gene or the number of the family for a variable gene. Annotation is deduced from the protein product annotation in the cyanophage GenBank files and, for T4 core genes, from the notes in the T4 GenBank file.
